# Supplementary material for: Analysis of the genetic diversity and population structure of Monochasma savatieri Franch. ex Maxim using novel EST-SSR markers
Source: PubMed Central journal article supplement (PMC9382759; doi:10.1186/s12864-022-08832-x), 2022-08-16

**Supplemental Table 1.** Details and sources of the 46 *Monochasma savatieri* samples analyzed in this study

| Population    | Number | Voucher No. | Location            | Longitude | Latitude |
|---------------|--------|-------------|---------------------|-----------|----------|
| Fujian (FJ)   | 1      | FJ-ND1      | Ningde, Fujian      | 119.648   | 27.465   |
|               | 2      | FJ-ND2      | Ningde, Fujian      | 119.648   | 27.465   |
|               | 3      | FJ-ND3      | Ningde, Fujian      | 119.648   | 27.465   |
|               | 4      | FJ-ND4      | Ningde, Fujian      | 119.648   | 27.465   |
|               | 5      | FJ-ND5      | Ningde, Fujian      | 119.648   | 27.465   |
|               | 6      | FJ-SM1      | Sanming , Fujian    | 116.664   | 26.451   |
|               | 7      | FJ-SM2      | Sanming , Fujian    | 116.664   | 26.451   |
|               | 8      | FJ-SM3      | Sanming , Fujian    | 116.664   | 26.451   |
|               | 9      | FJ-SM4      | Sanming , Fujian    | 116.664   | 26.451   |
| Hunan (HN)    | 10     | HN-HY1      | Hengyang , Hunan    | 112.104   | 26.845   |
|               | 11     | HN-HY2      | Hengyang , Hunan    | 112.104   | 26.845   |
|               | 12     | HN-HY3      | Hengyang , Hunan    | 112.104   | 26.845   |
|               | 13     | HN-HY4      | Hengyang , Hunan    | 112.104   | 26.845   |
|               | 14     | HN-HY5      | Hengyang , Hunan    | 112.104   | 26.845   |
|               | 15     | HN-HY6      | Hengyang , Hunan    | 112.104   | 26.845   |
|               | 16     | HN-ZZ1      | Zhuzhou, Hunan      | 113.585   | 27.815   |
|               | 17     | HN-ZZ2      | Zhuzhou, Hunan      | 113.585   | 27.815   |
|               | 18     | HN-ZZ3      | Zhuzhou, Hunan      | 113.585   | 27.815   |
|               | 19     | HN-ZZ4      | Zhuzhou, Hunan      | 113.585   | 27.815   |
|               | 20     | HN-ZZ5      | Zhuzhou, Hunan      | 113.585   | 27.815   |
| Jiangxi (JX)  | 21     | JX-FZ1      | Fuzhou , Jiangxi    | 115.813   | 27.636   |
|               | 22     | JX-FZ2      | Fuzhou , Jiangxi    | 115.813   | 27.636   |
|               | 23     | JX-FZ3      | Fuzhou , Jiangxi    | 115.813   | 27.636   |
|               | 24     | JX-SR1      | Shangrao , Jiangxi  | 118.198   | 29.383   |
|               | 25     | JX-SR2      | Shangrao , Jiangxi  | 118.198   | 29.383   |
|               | 26     | JX-SR3      | Shangrao , Jiangxi  | 118.198   | 29.383   |
|               | 27     | JX-SR4      | Shangrao , Jiangxi  | 118.198   | 29.383   |
|               | 28     | JX-YC1      | Yichun , Jiangxi    | 114.451   | 27.845   |
| Zhejiang (ZJ) | 29     | ZJ-HZ1      | Hangzhou , Zhejiang | 119.832   | 30.281   |
|               | 30     | ZJ-HZ2      | Hangzhou , Zhejiang | 119.832   | 30.281   |
|               | 31     | ZJ-HZ3      | Hangzhou , Zhejiang | 119.832   | 30.281   |
|               | 32     | ZJ-HZ4      | Hangzhou , Zhejiang | 119.832   | 30.281   |
|               | 33     | ZJ-HZ5      | Hangzhou , Zhejiang | 119.832   | 30.281   |
|               | 34     | ZJ-HZ6      | Hangzhou , Zhejiang | 119.832   | 30.281   |
|               | 35     | ZJ-JH1      | Jinhua , Zhejiang   | 119.636   | 29.185   |
|               | 36     | ZJ-JH2      | Jinhua , Zhejiang   | 119.636   | 29.185   |
|               | 37     | ZJ-JH3      | Jinhua , Zhejiang   | 119.636   | 29.185   |
|               | 38     | ZJ-JH4      | Jinhua , Zhejiang   | 119.636   | 29.185   |
|               | 39     | ZJ-JH5      | Jinhua , Zhejiang   | 119.636   | 29.185   |
|               | 40     | ZJ-JH6      | Jinhua , Zhejiang   | 119.636   | 29.185   |

---

|    |        |                   |         |        |
|----|--------|-------------------|---------|--------|
| 41 | ZJ-LS1 | Lishui , Zhejiang | 120.328 | 28.613 |
| 42 | ZJ-LS2 | Lishui , Zhejiang | 120.328 | 28.613 |
| 43 | ZJ-LS3 | Lishui , Zhejiang | 120.328 | 28.613 |
| 44 | ZJ-LS4 | Lishui , Zhejiang | 120.328 | 28.613 |
| 45 | ZJ-LS5 | Lishui , Zhejiang | 120.328 | 28.613 |
| 46 | ZJ-LS6 | Lishui , Zhejiang | 120.328 | 28.613 |

---

**Supplemental Fig. 1** The representative gel pictures with scoring by the EST-SSR markers. The patterns of bands were analyzed by a gel imaging analysis system (version Tocan 240)

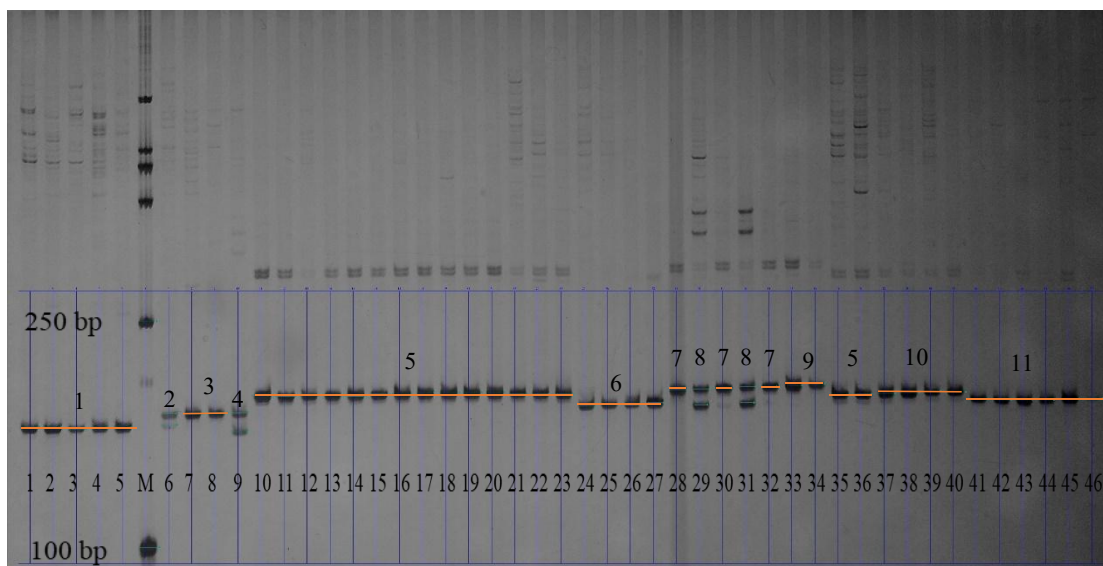

LRC-19013-3

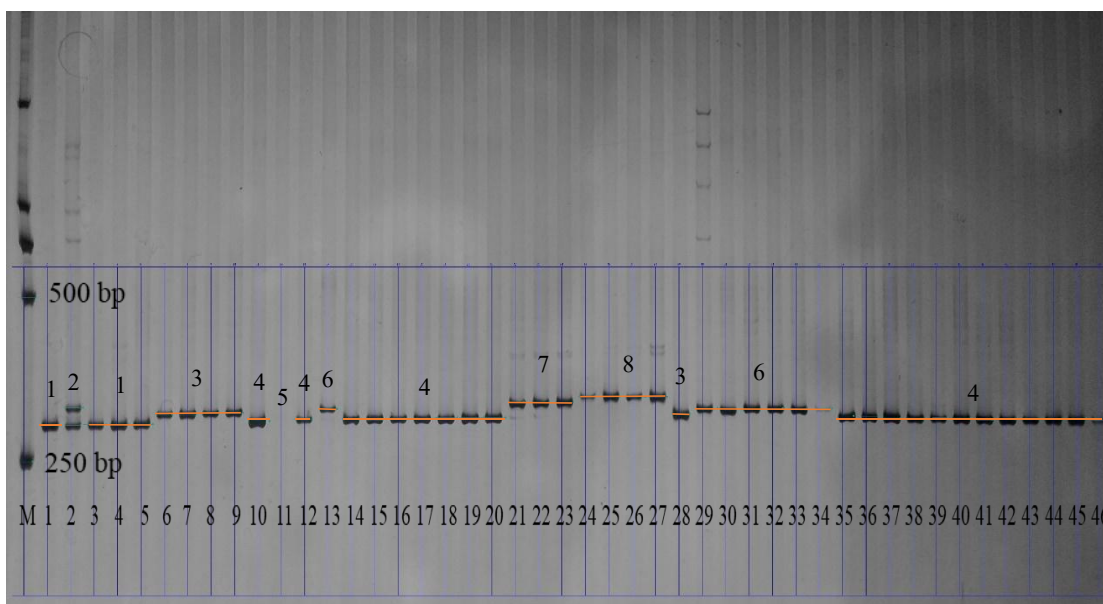

LRC-35320-1

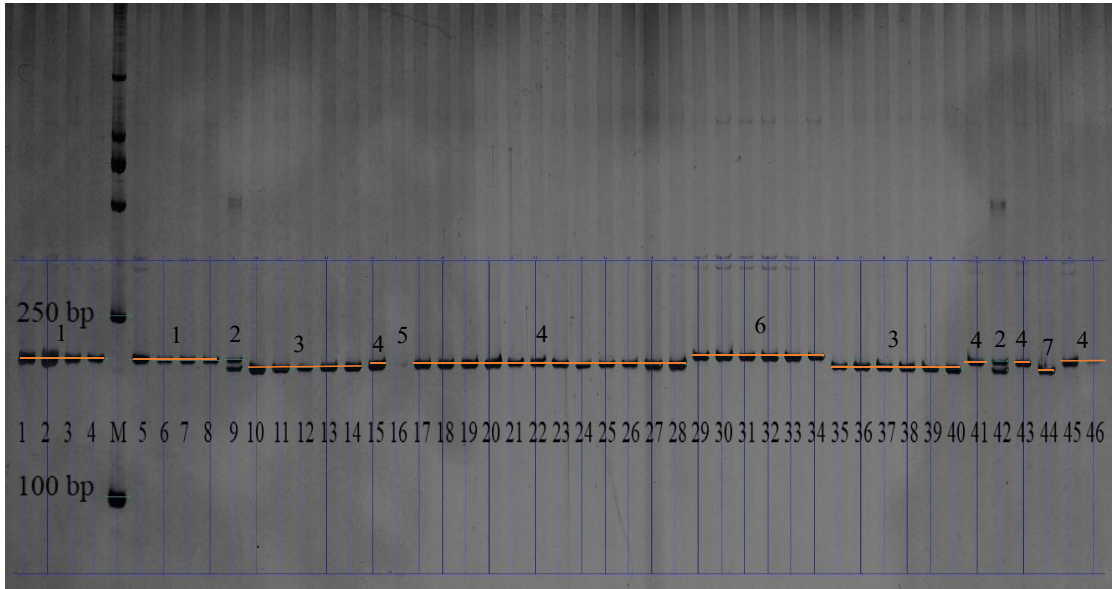

LRC-10353-1

**Supplemental Fig. 2** The photos of some representative samples in this study

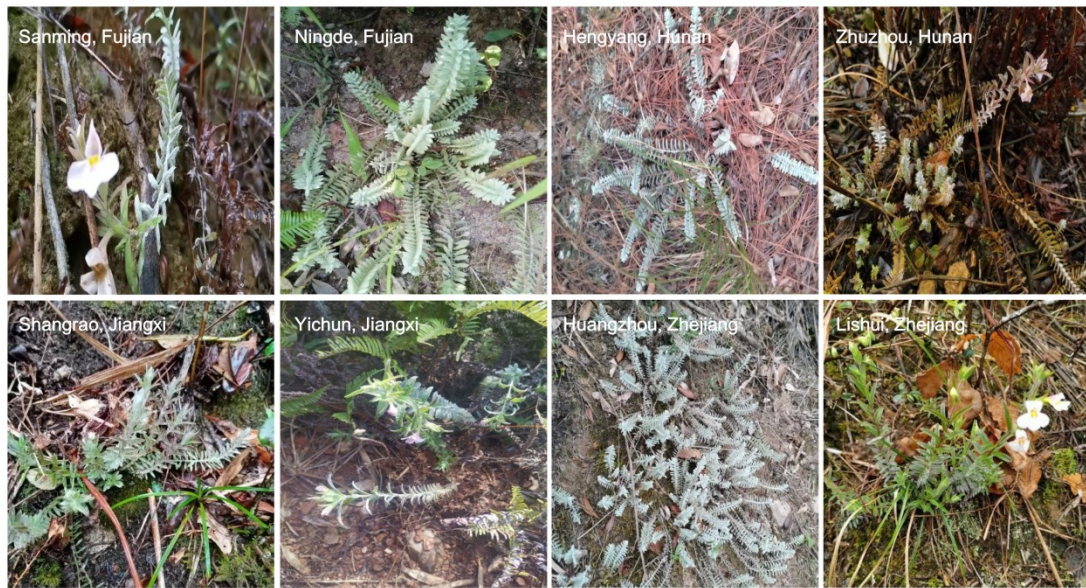

Supplement: 12864_2022_8832_MOESM1_ESM.pdf [file 12864_2022_8832_MOESM1_ESM.pdf]
